# Supplementary material for: Simultaneous Determination of Twenty Mycotoxins in the Korean Soybean Paste Doenjang by LC-MS/MS with Immunoaffinity Cleanup
Source: PubMed Central journal article supplement (PMC6832528; doi:10.3390/toxins11100594), 2019-10-12
Supplement: toxins-11-00594-s001.pdf [file toxins-11-00594-s001.pdf]

# Supplementary Materials: Simultaneous Determination of Twenty Mycotoxins in the Korean Soybean Paste Doenjang by LC-MS/MS with Immunoaffinity Cleanup

So Young Woo, So Young Ryu, Fei Tian, Sang Yoo Lee, Su Been Park and Hyang Sook Chun

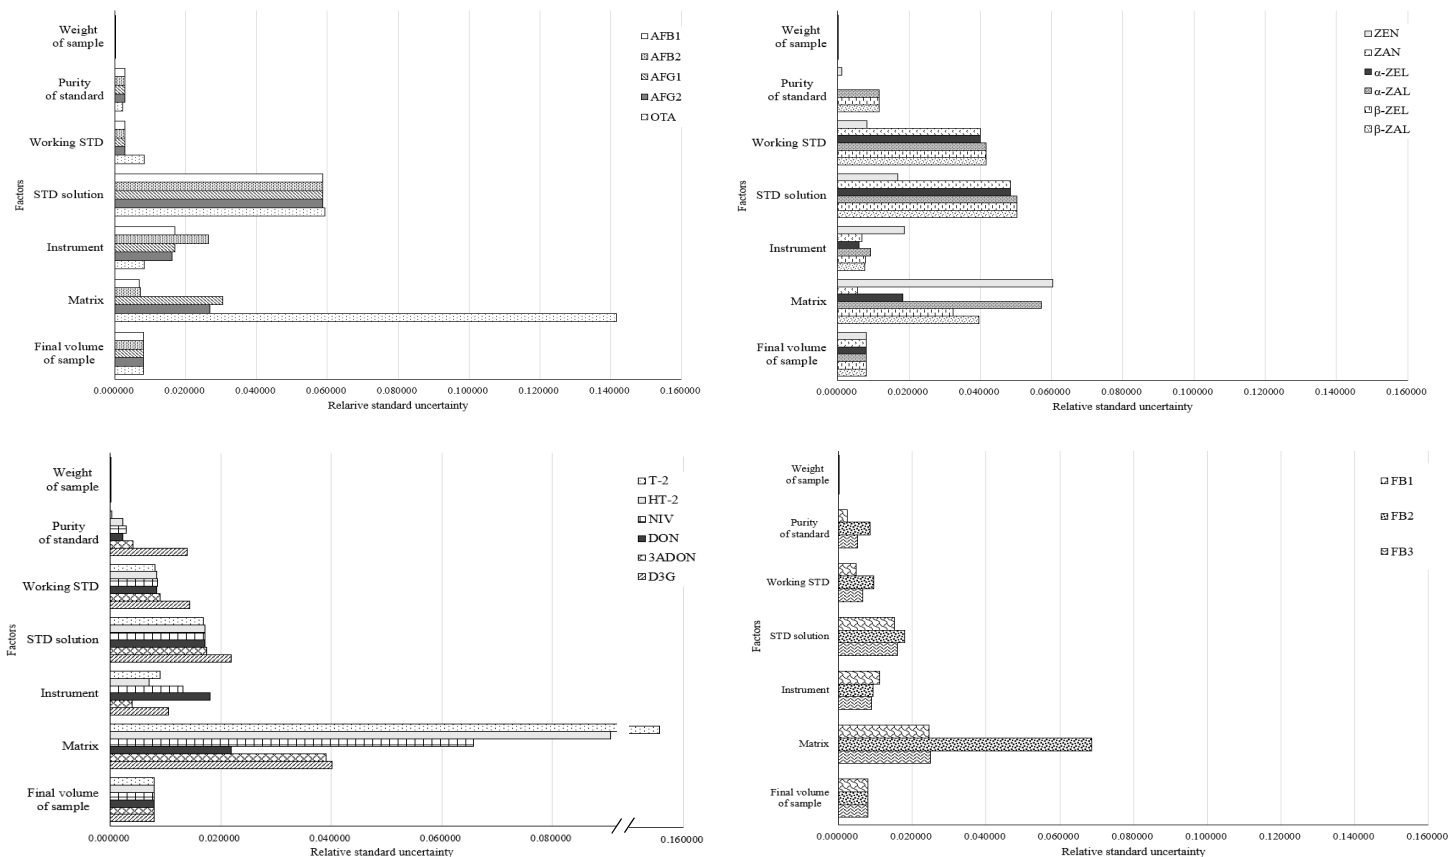

**Figure S1.** Contributions of each of the factors to the total uncertainty (10 µg/kg for aflatoxins (AFs) and ochratoxin A (OTA), 15 µg/kg for other mycotoxins).
